# Supplementary material for: Reduction in vehicular emissions attributable to the Covid-19 lockdown in Shanghai: insights from 5-year monitoring-based machine learning
Source: Copernicus journal article supplement (doi:10.5194/egusphere-2023-204), 2023-04-06
Supplement: Supplementary file 1 [file egusphere-2023-204-supplement.pdf]

*Supplementary for*

## **Reduction in vehicular emissions attributable to the Covid-19 lockdown in Shanghai: insights from 5-year monitoring-based machine learning**

Meng Wang<sup>1</sup>, Yusen Duan<sup>2</sup>, Zhuozhi Zhang<sup>1</sup>, Qi Yuan<sup>1</sup>, Xinwei Li<sup>1</sup>, Shuwen Han<sup>1</sup>, Juntao Huo<sup>2</sup>, Jia Chen<sup>2</sup>, Yanfen Lin<sup>2</sup>, Qingyan Fu<sup>2, \*</sup>, Tao Wang<sup>1</sup>, Junji Cao<sup>3,4</sup>, Shun-cheng Lee<sup>1, \*</sup>

<sup>1</sup>Department of Civil and Environmental Engineering, The Hong Kong Polytechnic University, Hung Hom, Hong Kong SAR, China

<sup>2</sup>Shanghai Environmental Monitoring Center, Shanghai, China

<sup>3</sup>State Key Laboratory of Loess and Quaternary Geology, Institute of Earth Environment, Chinese Academy of Sciences, Xi'an 710061, China

<sup>4</sup>Key Laboratory of Middle Atmosphere and Global Environment Observation, Institute of Atmospheric Physics, Chinese Academy of Sciences, Beijing 100029, China

*Correspondence to:* shun-cheng.lee@polyu.edu.hk (S.C. Lee) and qingyanf@sheemc.cn (Q.Y. Fu).

**Table S1. Correlation coefficient R between predicted and measured NO<sub>x</sub> and EC using the random forest model and the multi-regression model.**

| R               | Random Forest | Multi-linear regression |
|-----------------|---------------|-------------------------|
| NO <sub>x</sub> | 0.89-0.98     | 0.48                    |
| EC              | 0.90-0.98     | 0.45                    |

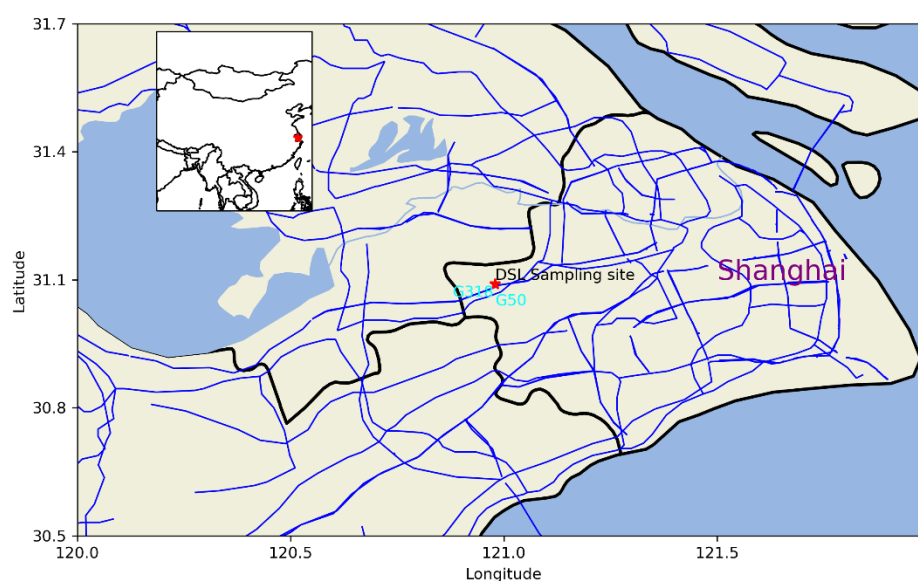

**Figure S1.** The location of Dianshan Lake (DSL) supersite in west Shanghai. Blue lines represent roads. The DSL sampling site is approximately 1 km away from the nearest highways (G318 and G50). The Inset shows the location of the sampling site in China. (The map was created using a Python package of Cartopy)

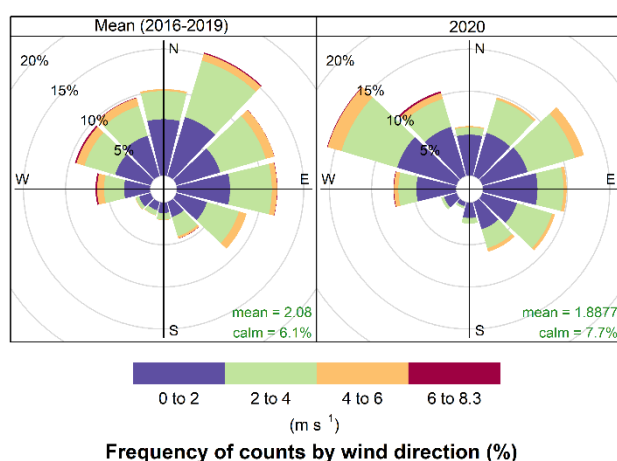

**Figure S2.** Wind roses for the period between 2016 and 2019 (left), and the year of 2020 with the Covid-19 lockdown (right).

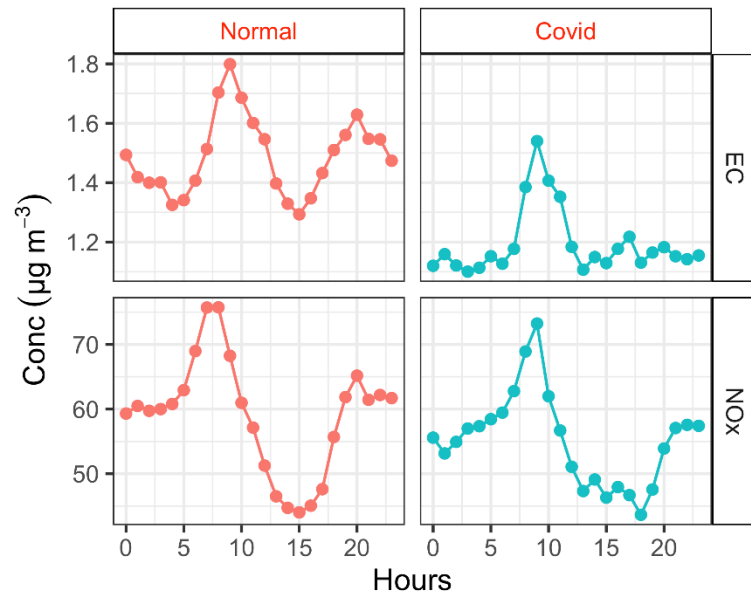

Figure S3. Averaged diurnal cycle of NO<sub>x</sub> and EC during the normal years (2016-2019) and 2020 with Covid.

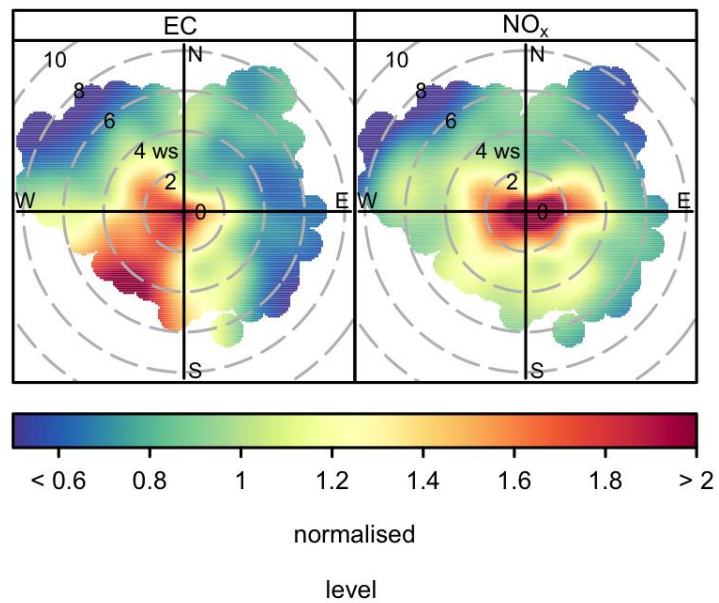

Figure S4. Polar plot of the normalized EC and NO<sub>x</sub> as a function of wind speed and direction.
